# Supplementary material for: The regenerating skeletal muscle niche drives satellite cell return to quiescence
Source: PubMed Central journal article supplement — iScience. 2022 May 23;25(6):104444. doi: 10.1016/j.isci.2022.104444 (PMC9207300; doi:10.1016/j.isci.2022.104444), 2022-05-23

iScience, Volume 25

## **Supplemental information**

### **The regenerating skeletal muscle niche drives satellite cell return to quiescence**

**Alicia A. Cutler, Bradley Pawlikowski, Joshua R. Wheeler, Nicole Dalla Betta, Tiffany Elston, Rebecca O'Rourke, Kenneth Jones, and Bradley B. Olwin**

## **Supplemental Information Titles and Legends**

### **Supplemental Figure 1 EdU labeling of injured TA muscle. Related to Figure 1**

(A) Representative tissue sections from injured TA muscles at the indicated dpi. Three EdU injections two hours apart were given prior to collection. SCs (white arrows) are Pax7immunoreactive (red) and EdU+ (green) if labeled by EdU injection. Myofibers are outlined by laminin immunoreactivity (white) and nuclei identified by DAPI staining. Scale bars=100  $\mu\text{m}$ .

### **Supplemental Figure 2 Myogenic cluster characterization. Related to Figure 2**

(A) Hierarchical clustering of the 1000 most highly expressed genes across each myogenic cluster. Heat map indicates z-score and relative expression with red indicating increased expression, blue decreased expression, and gray undetected. (B) UMAP of the 5 clusters identified in the subclustering of SCs and myogenic progenitors. (C) UMAP embeddings for Pax7, Myod1, Myog, Myf5 and Cdkn1c expression in identified myogenic progenitor cell populations. (D) Gene expression levels of Myf5 and Cdkn1c are indicated for the clusters presented in B. (E) UMAP of the SC and myogenic progenitor subclusters presented in B with cell cycle state overlaid in blue ( $G_1/G_0$ ), green (S), or orange ( $G_2/M$ ).

### **Supplemental Figure 3 PAGA trajectory of all myogenic subclusters. Related to Figure 2**

(A) UMAP including all regenerating myogenic subclusters (B) PAGA trajectory analysis of all myogenic cells (C) Subclustering of the early myogenic PAGA trajectory analysis of all myogenic cells.

**Supplemental Figure 4 Differential gene expression of myogenic clusters. Related to Figure 2**

(A) Differential gene expression analysis for clusters 0, 1, 2, and 3. Significantly differentially expressed transcripts are plotted with those harboring increased expression (defined as log 2-fold change  $>0.5$ ) are colored in orange and those with decreased expression (defined as log 2-fold change  $<0.5$ ) colored blue. (B) Differential gene expression analysis for cluster 4 transcripts with significantly differentially expressed transcripts plotted. (C) Differential gene expression analysis for cluster 4 versus cluster 2. Differential gene expression analyses were performed using a non-parametric Wilcoxon rank sum test. Please see Table S6 for complete details.

**Supplemental Figure 5 Bona fide signaling molecules interaction potential and expression. Related to Figure 4**

(A) A heatmap depicting the interaction potential of bona fide (present in a validated curated ligand-receptor database), top-ranked NicheNet genes encoding ligands with receptors on myogenic cells. (B) Expression levels for top-ranking bona fide genes encoding ligands in mononuclear cells from regenerating skeletal muscle. The heat map indicates the relative expression level.

**Supplemental Figure 6 Ligand regulatory potential. Related to Figure 5.**

NicheNet imputed regulatory potential of expressed genes encoding ligands for receptors expressed on SCs. Regulatory potential represents how well documented the ligand/receptor interactions are and the enrichment of the ligand and receptor transcripts in the dataset.

**Supplemental Figure 7 SC cell surface receptor expression and BaCl<sub>2</sub> incubation. Related to Figure 5.**

(A) UMAP of the 5 clusters identified in the subclustering of SCs and myogenic progenitors including UMAP embeddings for Eng, Atp5b, Cd34, Itgb1, and CD47 expression in identified myogenic progenitor cell populations. (B) Colony formation of primary donor cells incubated in either normal saline or BaCl<sub>2</sub> for the duration of the transplant procedure and then plated and grown *in vitro*. Compared by paired t-test  $p=0.406$ ,  $n=$  independent donor isolates.

Figure S1

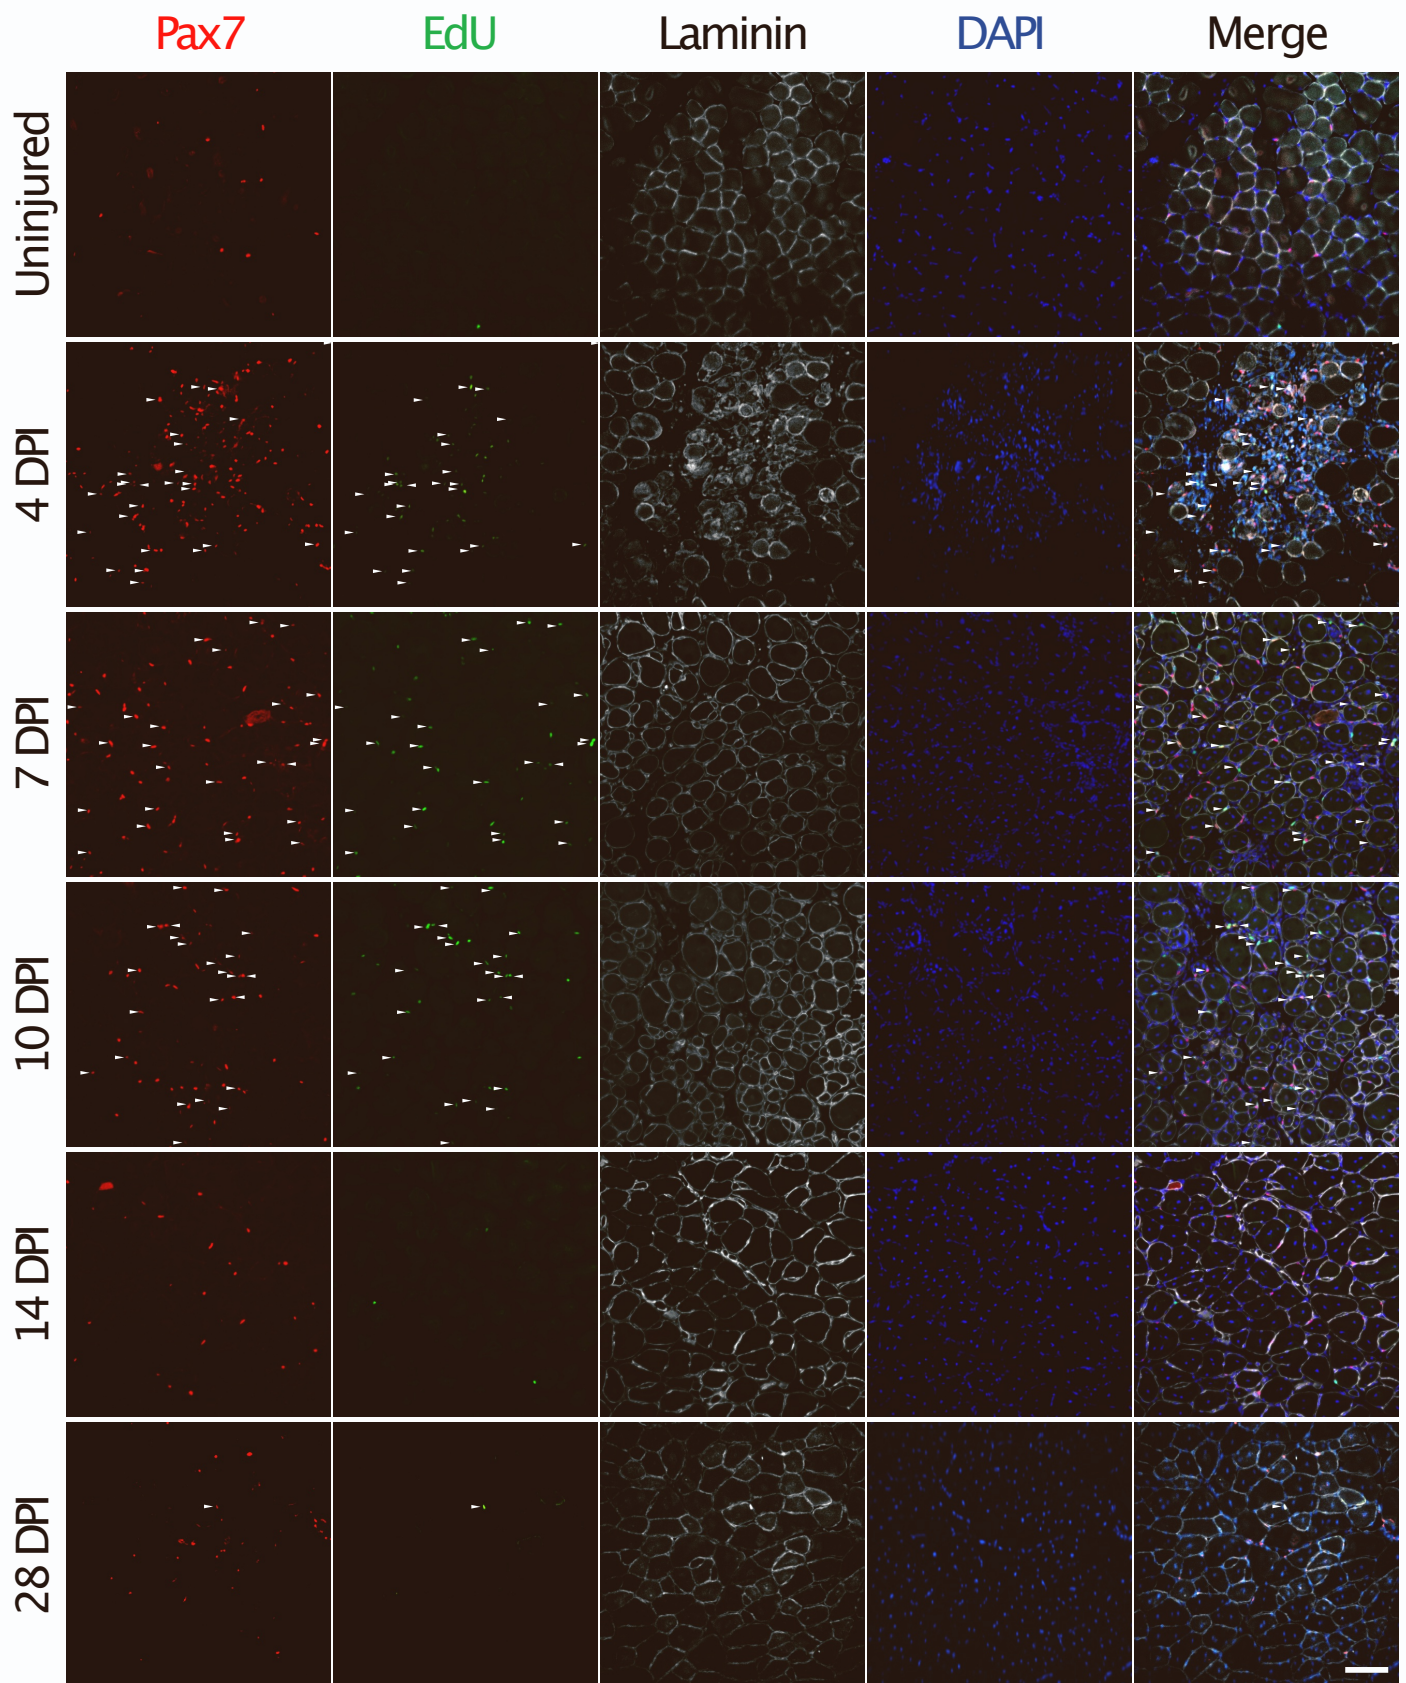

Figure S2

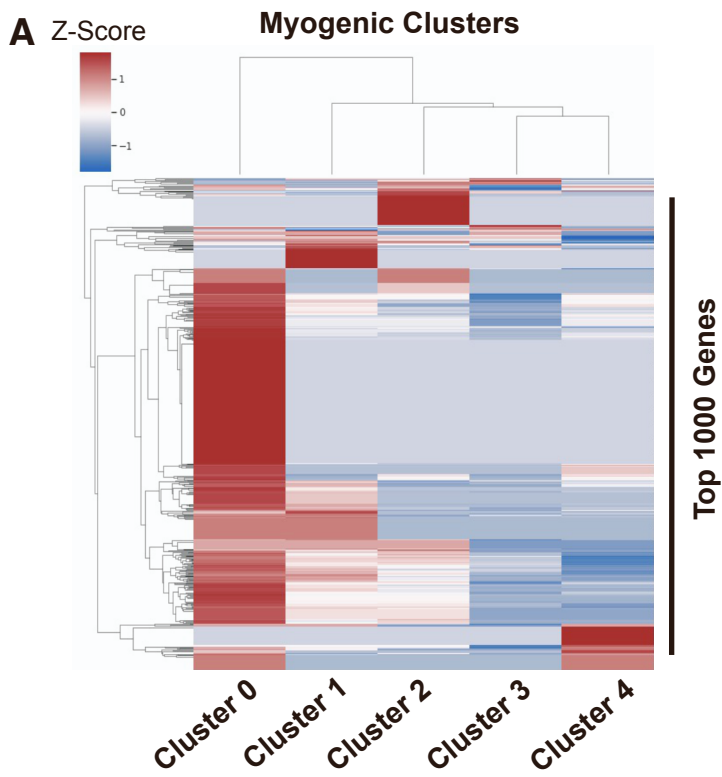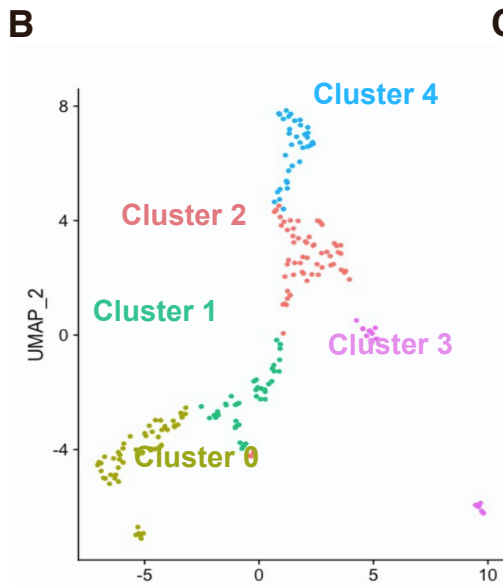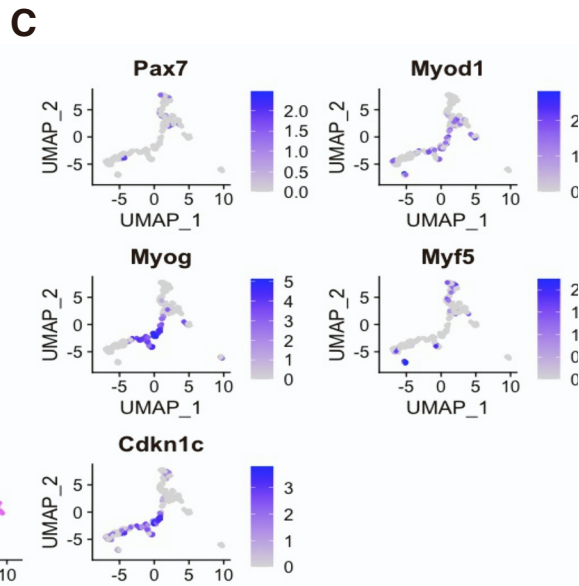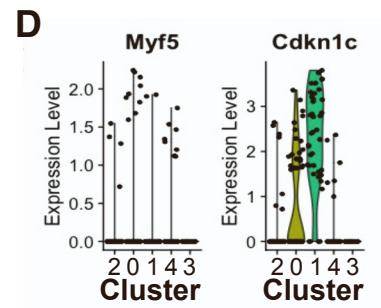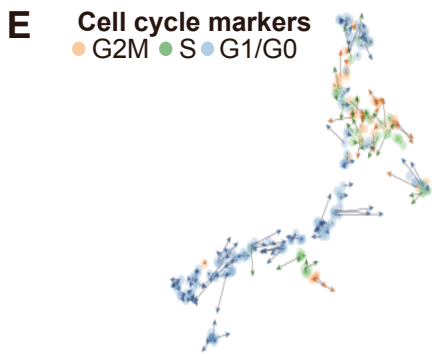

Figure S3

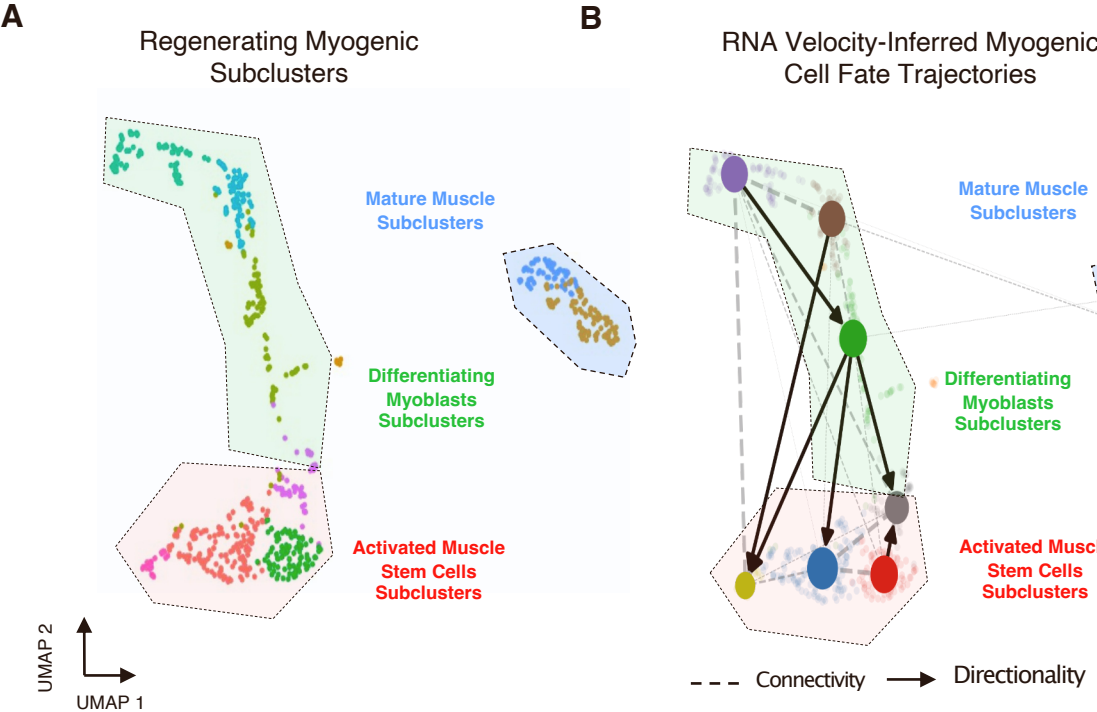

Figure S4

### Differential Gene Expression Analysis of Myogenic Clusters

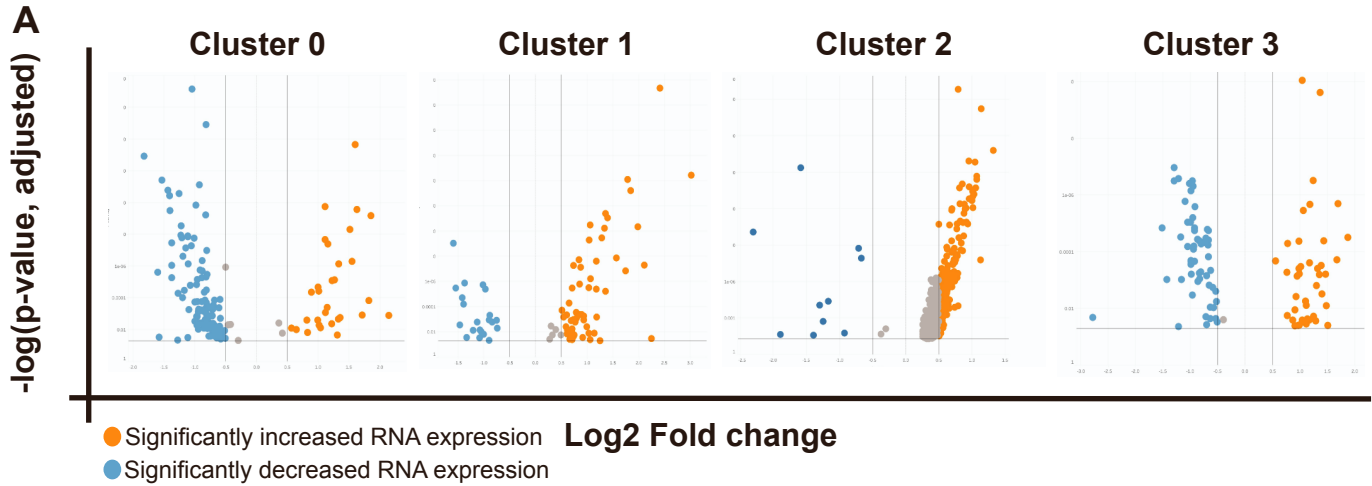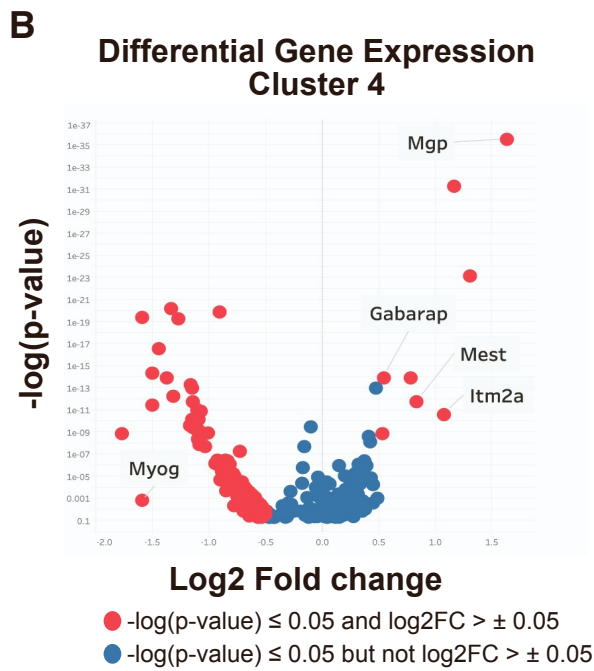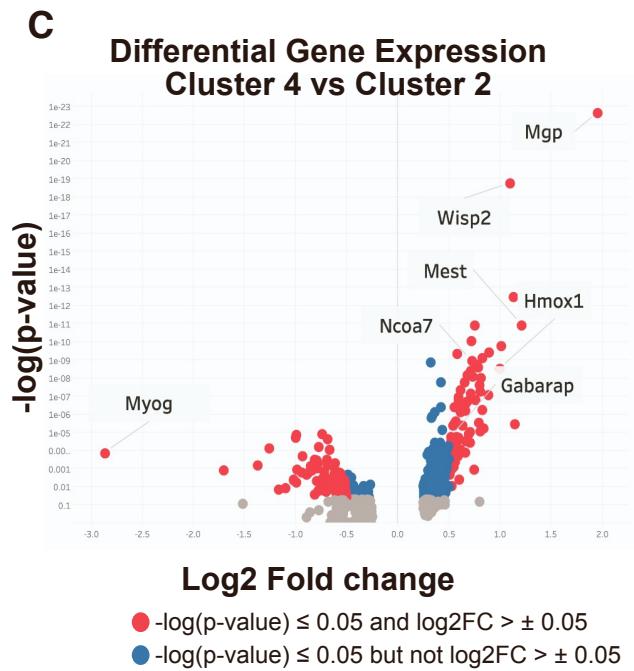





Figure S6

### Prioritized Environmental Ligands

Gene Expression (Across All Myogenic Clusters)

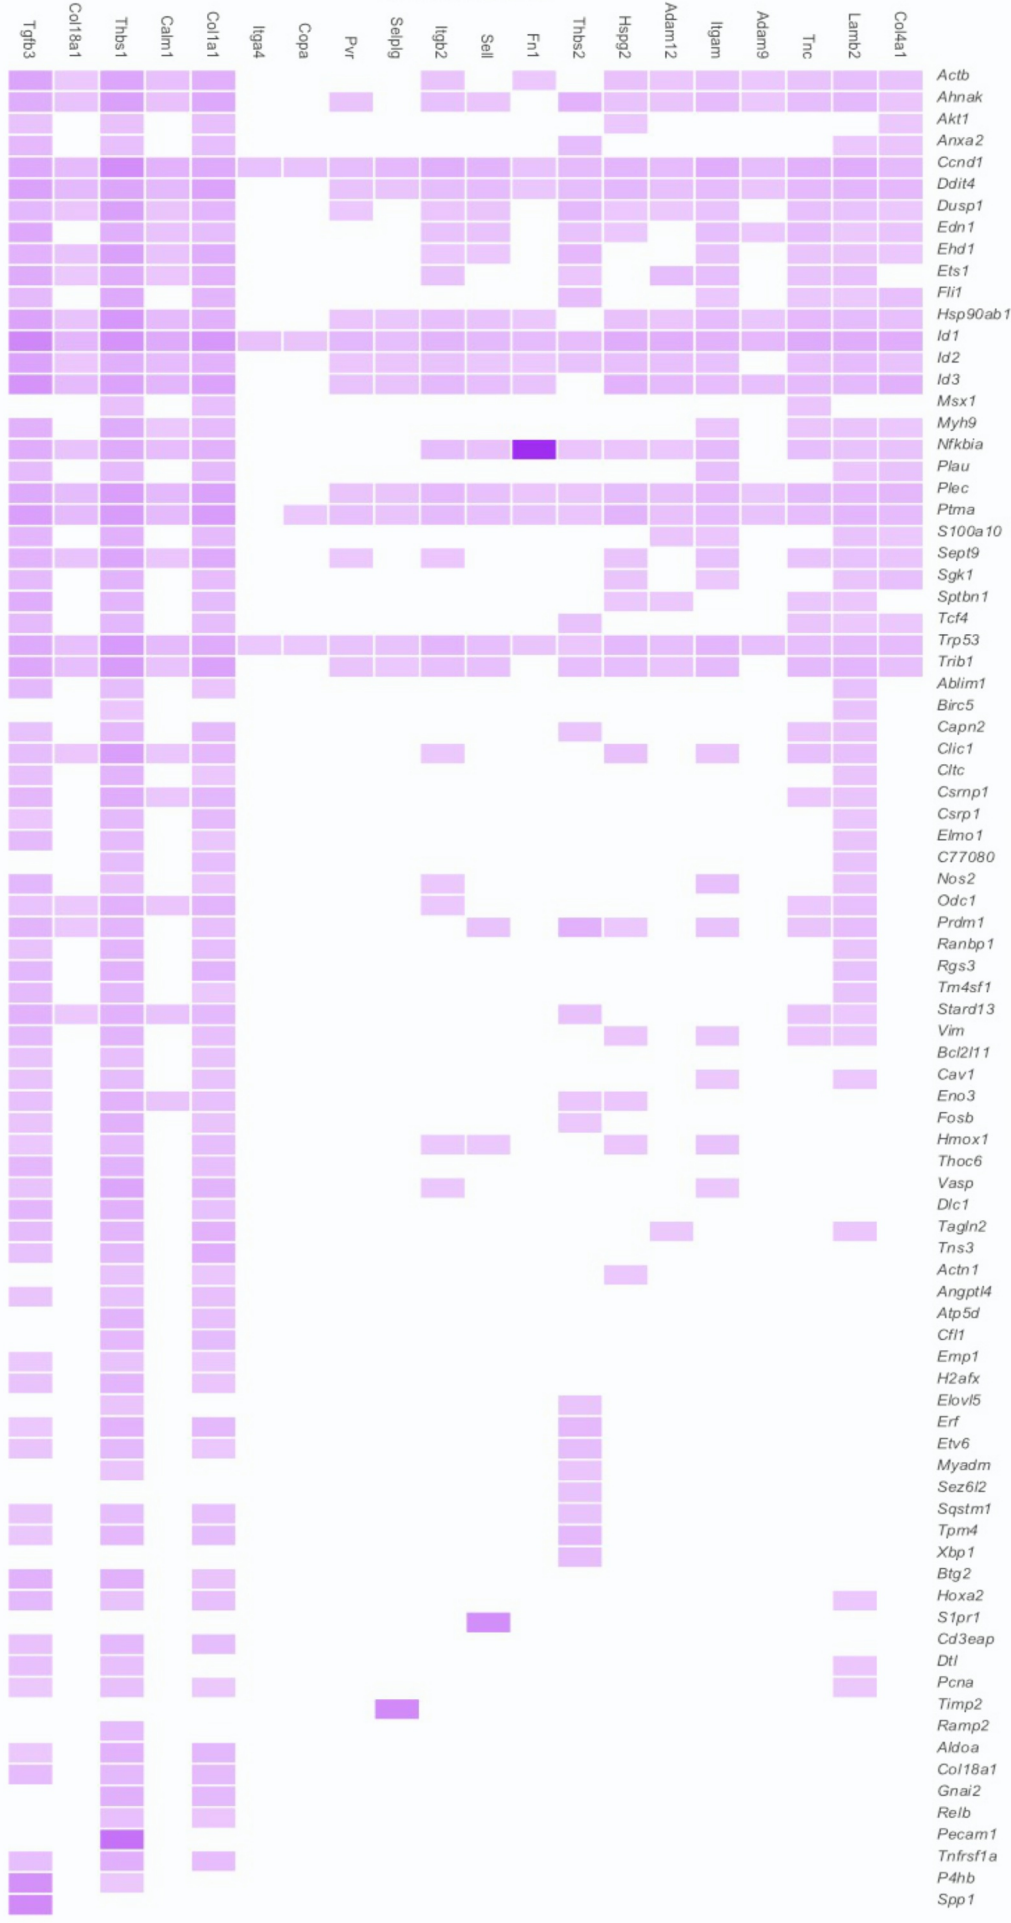

Regulatorv Potential  
0 0.01

Figure S7

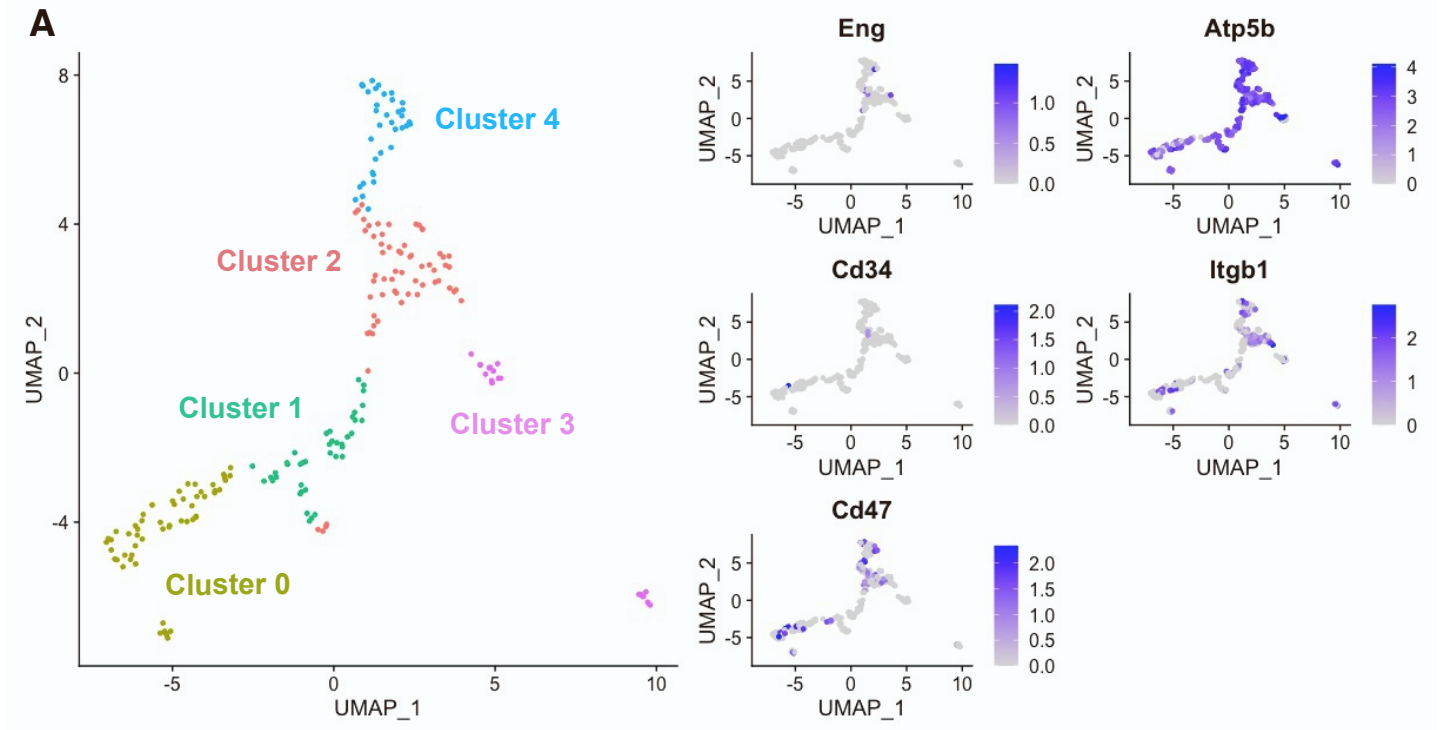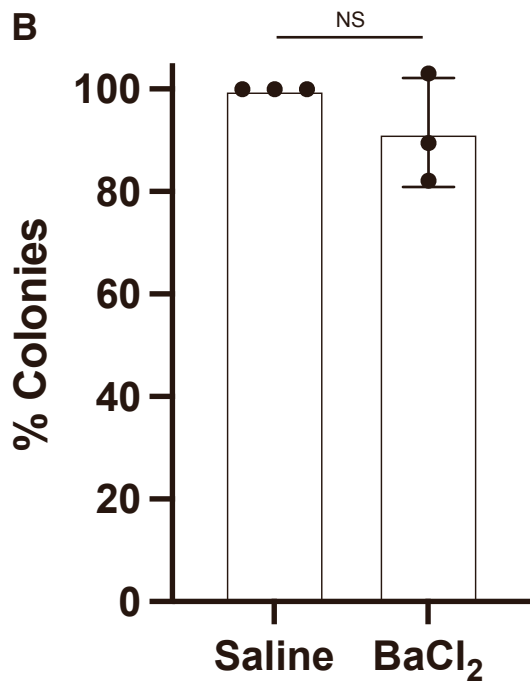

Supplement: mmc1.pdf [file mmc1.pdf]
